# Supplementary material for: Molecular insight into the differential anti-androgenic activity of resveratrol and its natural analogs: in silico approach to understand biological actions
Source: Royal Society of Chemistry journal article supplement (doi:10.1039/c6mb00186f), 2016-04-05
Supplement: c6mb00186f1.pdf [file c6mb00186f1.pdf]

### Supplementary figure

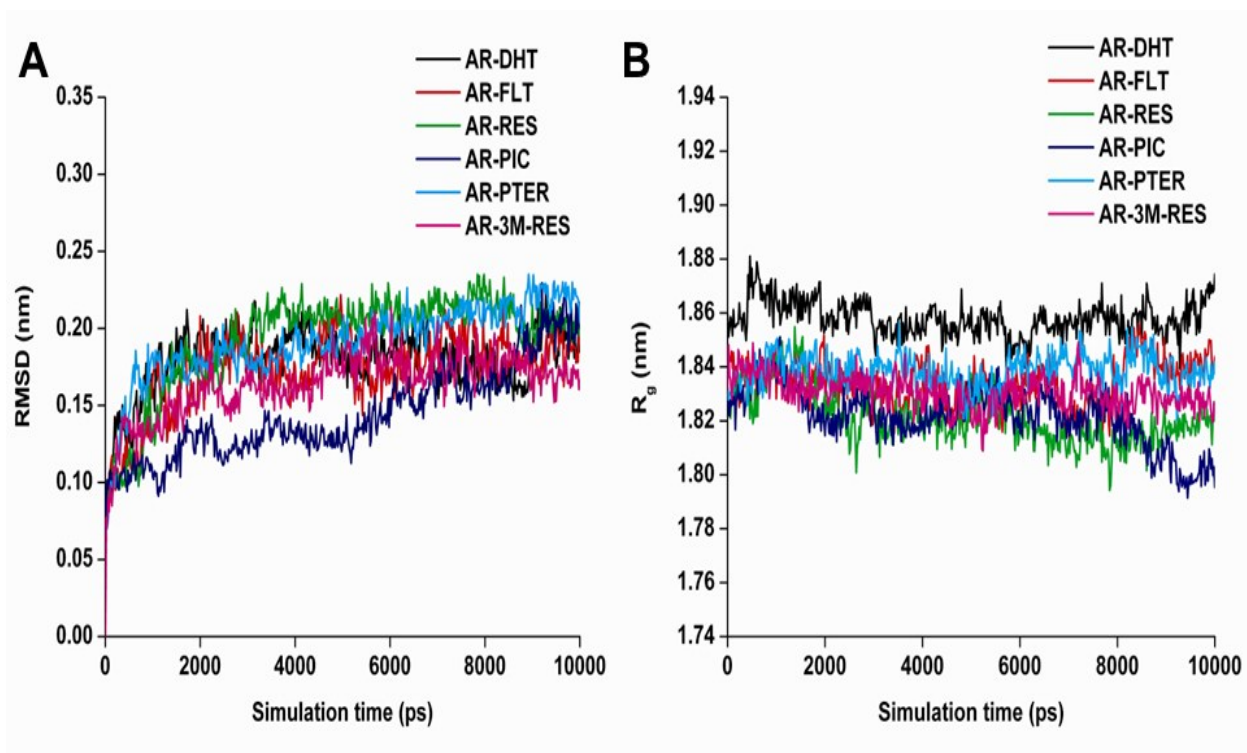

**Fig. S1:** Variations of dynamic parameters of AR bound to different ligands obtained from MD stimulation. (A) Variations in  $C\alpha$ -RMSD of AR monomer in presence of different bound ligands with simulation time. (B) Radius of gyration  $R_g$  profile of AR-ligand complexes with simulation time.
